# Supplementary material for: Nanoengineered immunosuppressive therapeutics modulating M1/M2 macrophages into the balanced status for enhanced idiopathic pulmonary fibrosis therapy
Source: Royal Society of Chemistry journal article supplement (doi:10.1039/d0nr00750a), 2020-01-01
Supplement: d0nr00750a1.pdf [file d0nr00750a1.pdf]

## Supporting Information

### **Nanoengineered Immunosuppressive Therapeutics Modulating M1/M2 Macrophages into Balanced Status for Enhanced Idiopathic Pulmonary Fibrosis Therapy**

*Xin Chang<sup>a,‡</sup>, Lei Xing<sup>a,b,c,d,‡</sup>, Yi Wang<sup>a</sup>, Tian-Jiao Zhou<sup>a</sup>, Li-Jun Shen<sup>a</sup>, Hu-Lin Jiang<sup>a,b,c,d,\*</sup>*

<sup>a</sup> State Key Laboratory of Natural Medicines, Department of Pharmaceutics, China

Pharmaceutical University, Nanjing 210009, China

<sup>b</sup> Jiangsu Key Laboratory of Druggability of Biopharmaceuticals, China Pharmaceutical

University, Nanjing 210009, China

<sup>c</sup> Jiangsu Key Laboratory of Drug Screening, China Pharmaceutical University, Nanjing

210009, China

<sup>d</sup> Jiangsu Key Laboratory of Drug Discovery for Metabolic Diseases, China Pharmaceutical

University, Nanjing 210009, China

\* Correspondence authors:

E-mail: [jianghulin3@gmail.com](mailto:jianghulin3@gmail.com). Phone/Fax number: 86-25-83271027.

## Supplementary Figures

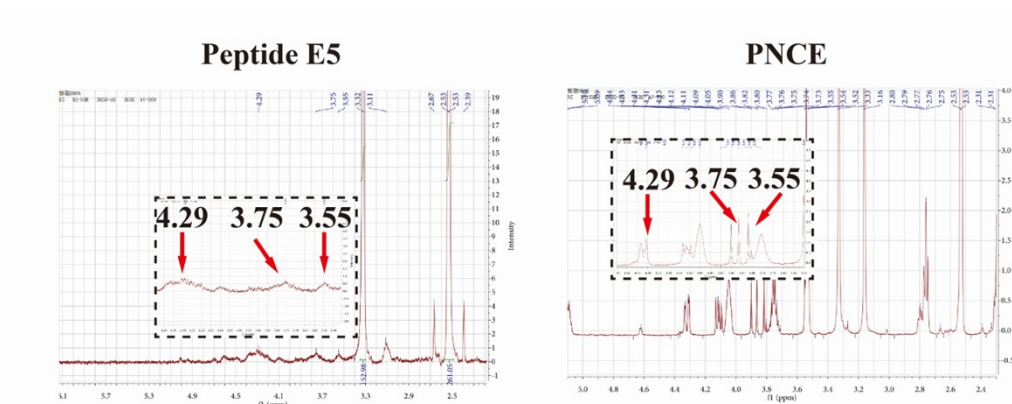

**Fig. S1.** The characterization of peptide E5 modified PNCE by  $^1\text{H}$  NMR spectroscopy.

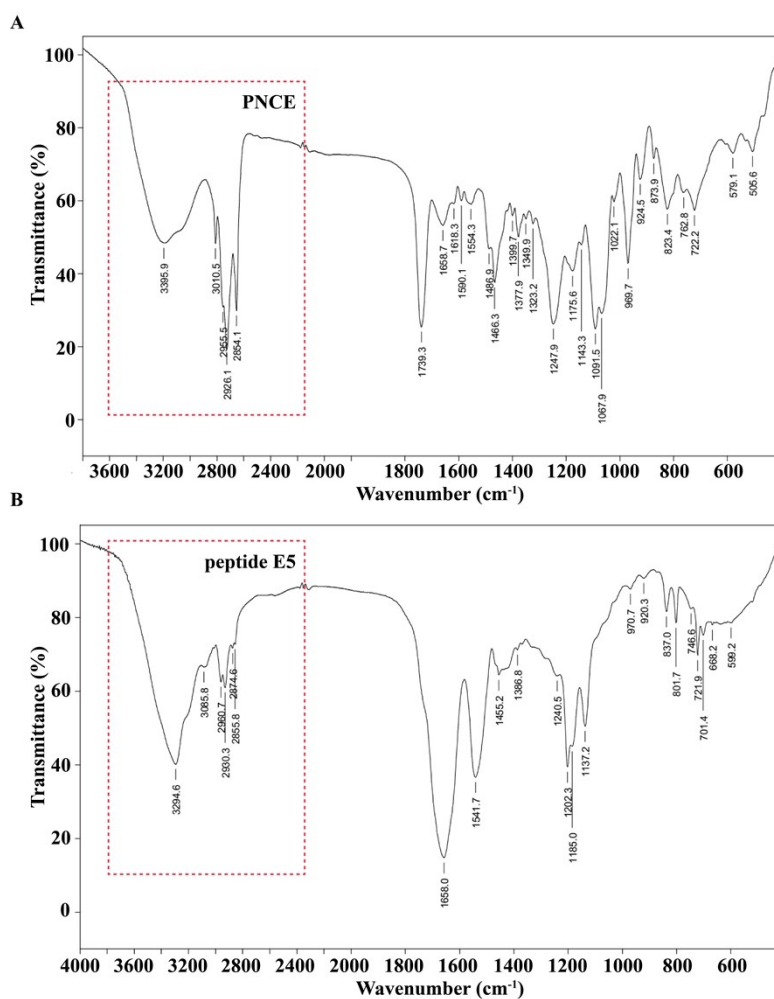

**Fig. S2.** The characterization of peptide E5 (A) modified PNCE (B) by Infrared spectroscopy.

**Table S1.** Particle-size distributions of different formulations.

|     | Diameter (nm) | PDI   |
|-----|---------------|-------|
| PC  | 91.45 ± 5.69  | 0.215 |
| PN  | 91.11 ± 6.14  | 0.211 |
| PNC | 106.16 ± 7.49 | 0.203 |

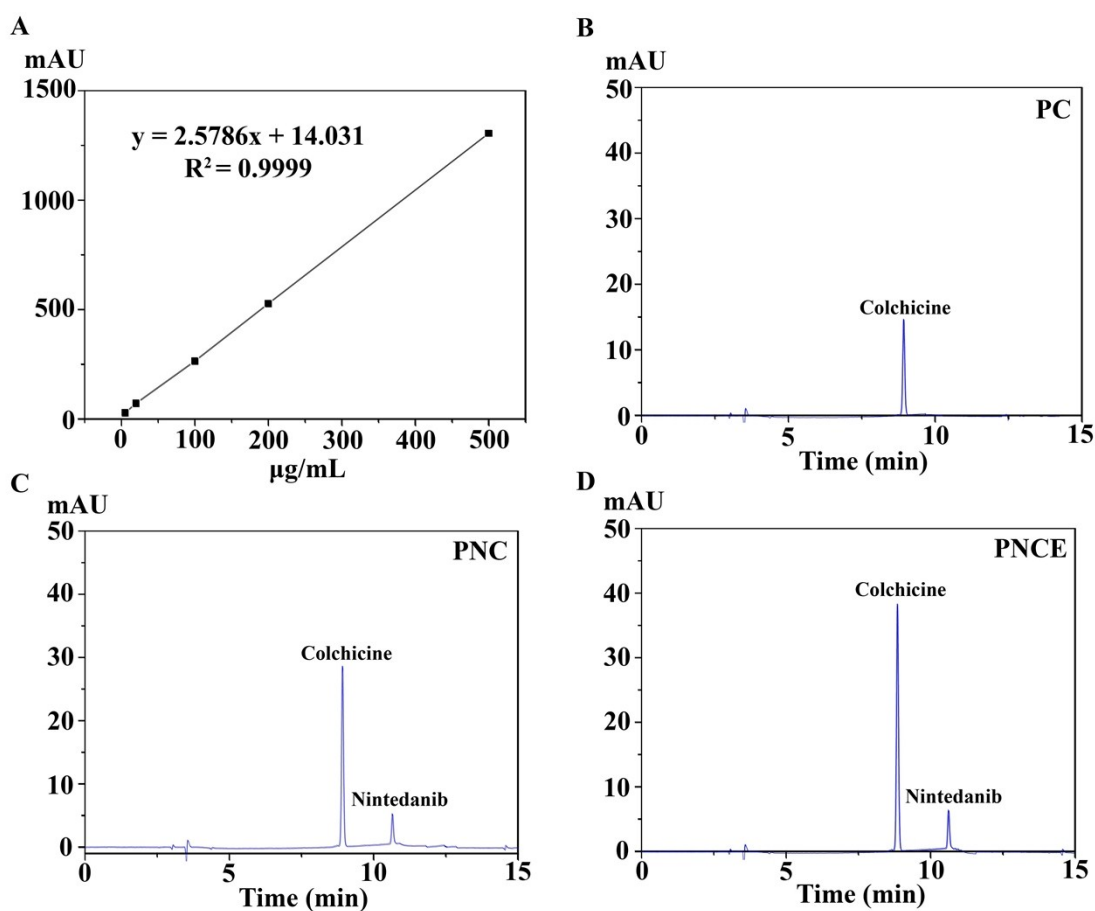

**Fig. S3.** HPLC Characterization. (A) The standard curve of colchicine (COL). High-Performance Liquid Chromatography (HPLC) chromatogram of COL in PC (B), PNC (C) and PNCE (D) at 350 nm.

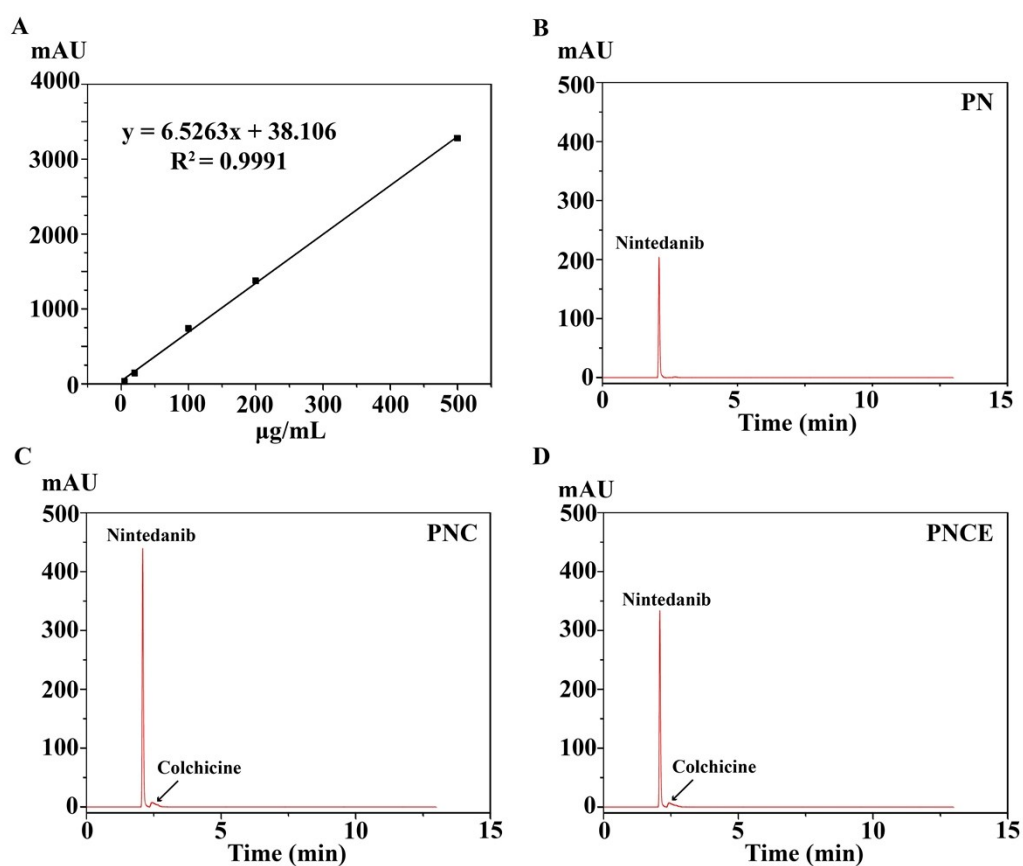

**Fig. S4.** HPLC Characterization. (A) The standard curve of nintedanib (NIN). High-Performance Liquid Chromatography (HPLC) chromatogram of NIN in PN (B), PNC (C) and PNCE (D) at 391 nm.

**Table S2.** The encapsulation efficiency (EE %) and loading efficiency (LE %) of different formulations.

|            |      | EE %          | LE %        |
|------------|------|---------------|-------------|
| Nintedanib | PN   | 101.92 ± 0.17 | 1.27 ± 0.05 |
|            | PNC  | 110.56 ± 0.37 | 1.39 ± 0.08 |
|            | PNCE | 105.84 ± 8.37 | 1.34 ± 0.02 |
| Colchicine | PC   | 62.69 ± 6.83  | 3.13 ± 0.09 |
|            | PNC  | 48.84 ± 3.79  | 2.44 ± 0.05 |
|            | PNCE | 68.91 ± 7.61  | 3.45 ± 0.07 |

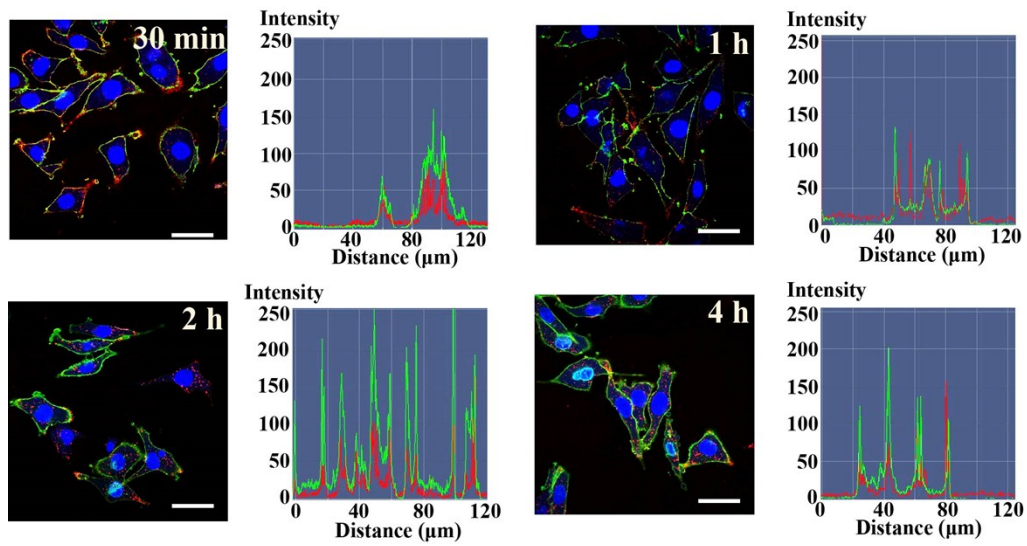

**Fig. S5.** The adhesion between monocyte-derived multipotent cells (MOMCs) and PNCE at different times by CLSM.

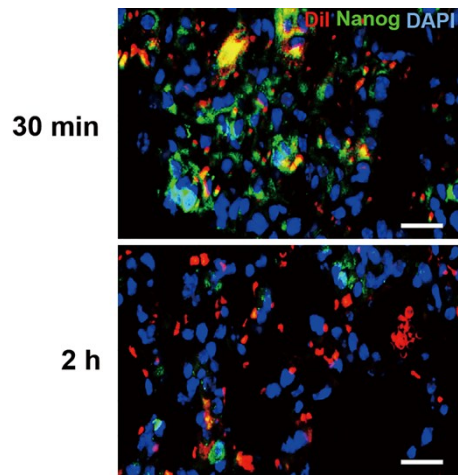

**Fig. S6.** The fluorescence intensity of Nanog-bind PNCE-DiI on MOMCs with different times.

Scale bar: 20  $\mu\text{m}$ .

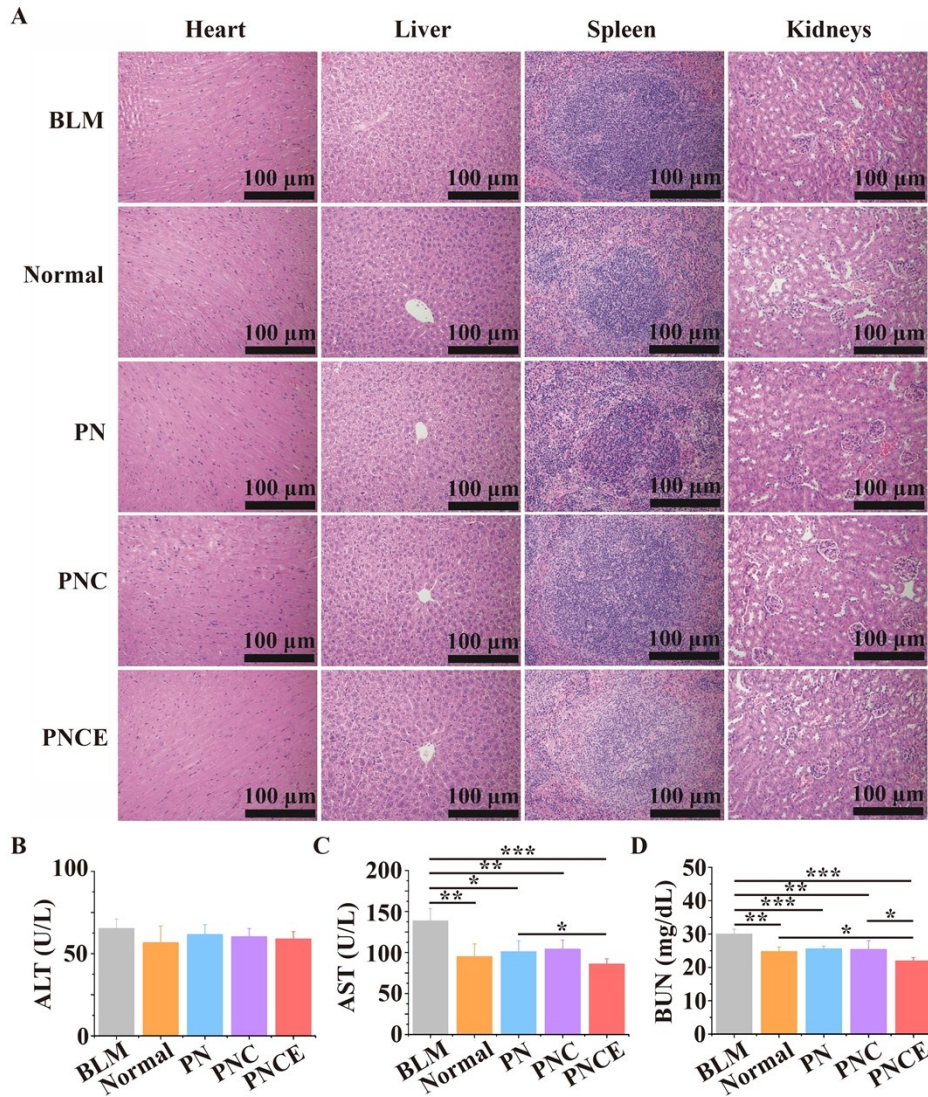

**Fig. S7.** Safety application of different formulations *in vivo*. A) H&E staining of other organs after different treatments. Scale bar: 100  $\mu$ m. Contents of ALT (B) and AST (C) in serum are to evaluate liver injury. (D) Contents of BUN in serum are to evaluate kidneys injury (n = 5). Statistical significance was calculated via one-way analysis of variance (ANOVA). \*P<0.05, \*\*P<0.01, \*\*\*P<0.001.
